# Supplementary material for: The quiescent fraction of chronic myeloid leukemic stem cells depends on BMPR1B, Stat3 and BMP4-niche signals to persist in patients in remission
Source: PubMed Central journal article supplement — Haematologica. 2020 Jan 30;106(1):111–22. doi: 10.3324/haematol.2019.232793 (PMC7776261; doi:10.3324/haematol.2019.232793), 2020-01-30
Supplement: 2019_232793_JEANPIERRE_SUPPL.pdf [file 2019_232793_JEANPIERRE_SUPPL.pdf]

# The quiescent fraction of chronic myeloid leukemic stem cells depends on BMPR1B, Stat3 and BMP4-niche signals to persist in patients in remission

Sandrine Jeanpierre,<sup>1,2,3,4,5\*</sup> Kawtar Arizkane,<sup>1,2,3,4\*</sup> Supat Thongjuea,<sup>6</sup> Elodie Grockowiak,<sup>1,2,3,4</sup> Kevin Geistlich,<sup>1,2,3,4</sup> Lea Barral,<sup>1,2,3,4</sup> Thibault Voeltzel,<sup>1,2,3,4</sup> Anissa Guillemin,<sup>7</sup> Sandrine Gonin-Giraud,<sup>7</sup> Olivier Gandrillon,<sup>7</sup> Franck-Emmanuel Nicolini,<sup>1,2,3,4,5</sup> Adam J. Mead,<sup>8</sup> Véronique Maguer-Satta<sup>1,2,3,4#</sup> and Sylvain Lefort<sup>1,2,3,4#</sup>

<sup>1</sup>CNRS UMR5286, Centre de Recherche en Cancérologie de Lyon, 69000 Lyon, France; <sup>2</sup>Inserm U1052, Centre de Recherche en Cancérologie de Lyon, 69000 Lyon, France; <sup>3</sup>Université de Lyon, 69000, Lyon, France; <sup>4</sup>Department of Signaling of Tumor Escape, Lyon, France; <sup>5</sup>Centre Léon Bérard, 69000 Lyon, France; <sup>6</sup>MRC WIMM Centre for Computational Biology, Weatherall Institute of Molecular Medicine, NIHR Oxford Biomedical Research Centre, John Radcliffe Hospital, Oxford, UK; <sup>7</sup>Laboratoire de Biologie et Modélisation de la Cellule, LBMC - Ecole Normale Supérieure - Lyon, Université Claude Bernard Lyon - Centre National de la Recherche Scientifique: UMR5239 - Institut National de la Santé et de la Recherche Médicale: U1210 - Ecole Normale Supérieure de Lyon, 69007 Lyon, France and <sup>8</sup>Haemopoietic Stem Cell Biology Laboratory, Weatherall Institute of Molecular Medicine, University of Oxford, Oxford, UK

\*SJ and KA contributed equally as co-first author.

#VM-S and SL contributed equally as co-senior authors.

©2021 Ferrata Storti Foundation. This is an open-access paper. doi:10.3324/haematol.2019.232793

Received: July 22, 2019

Accepted: January 27, 2020.

Pre-published: January 30, 2020.

Correspondence: VÉRONIQUE MAGUER-SATTA - veronique.maguer-satta@lyon.unicancer.fr

SYLVAIN LEFORT - sylvain.lefort@lyon.unicancer.fr

---

# **The quiescent fraction of chronic myeloid leukemic stem cells depends on BMPR1B, Stat3 and BMP4-niche signals to persist in patients in remission**

Sandrine Jeanpierre<sup>1,2,3,4,5§</sup>, Kawtar Arizkane<sup>1,2,3,4§</sup>, Supat Thongjuea<sup>6</sup>, Elodie Grockowiak<sup>1,2,3,4</sup>, Kevin Geistlich<sup>1,2,3,4</sup>, Lea Barral<sup>1,2,3,4</sup>, Thibault Voeltzel<sup>1,2,3,4</sup>, Anissa Guillemin<sup>7</sup>, Sandrine Giraud<sup>7</sup>, Olivier Gandrillon<sup>7</sup>, Franck-Emmanuel Nicolini<sup>1,2,3,4,5</sup>, Adam J. Mead<sup>8</sup>, Véronique Maguer-Satta<sup>1,2,3,4§</sup> and Sylvain Lefort<sup>1,2,3,4§</sup>

*1-CNRS UMR5286, Centre de Recherche en Cancérologie de Lyon, 69000 Lyon; 2-Inserm U1052, Centre de Recherche en Cancérologie de Lyon, 69000 Lyon; 3-Université de Lyon, 69000, Lyon, France; 4-Department of Signaling of tumor escape, Lyon; 5-Centre Léon Bérard, 69000 Lyon; 6-MRC WIMM Centre for Computational Biology, Weatherall Institute of Molecular Medicine, NIHR Oxford Biomedical Research Centre, John Radcliffe Hospital OX3 9DU, Oxford, UK; 7-Laboratoire de biologie et modélisation de la cellule. LBMC - Ecole Normale Supérieure - Lyon, Université Claude Bernard Lyon - Centre National de la Recherche Scientifique : UMR5239 - Institut National de la Santé et de la Recherche Médicale : U1210 - Ecole Normale Supérieure de Lyon 46 allée d'Italie 69007 Lyon, France; 8-Haemopoietic Stem Cell Biology Laboratory, Weatherall Institute of Molecular Medicine, University of Oxford, Oxford, UK*

*§: equal contribution*

**Corresponding author:** Dr. Véronique MAGUER-SATTA, PhD, Cancer Research Center of Lyon-CRCL, U1052-UMR5286, 28 rue Laennec, 69373 Lyon Cedex 08, FRANCE, 33-478 782 907, Fax 33-478 782 720, [veronique.maguer-satta@lyon.unicancer.fr](mailto:veronique.maguer-satta@lyon.unicancer.fr) or Dr. Sylvain LEFORT, PhD, Cancer Research Center of Lyon-CRCL, U1052-UMR5286, 28 rue Laennec, 69373 Lyon Cedex 08, FRANCE, 33-478 785 124, Fax 33- 478 782 720, [sylvain.lefort@lyon.unicancer.fr](mailto:sylvain.lefort@lyon.unicancer.fr)

### Supplemental figures legends

Supplemental Figure 1. (A) Beeswarm plots of *ID1*, *ID2*, *RUNX1* and *RUNX2* expression between group-A *BCR-ABL*<sup>+</sup> SCs from patients at remission (light blue; *n* = 122) and group-B *BCR-ABL*<sup>+</sup> SCs from patients at remission (purple; *n* = 123). Numbers of cells analyzed and numbers showing amplification for the selected genes are shown below the plot. The average gene expression level is indicated by red squares, and the boxes represent the median and quartiles of gene expression levels. *P*-values were calculated using the non-parametric Wilcoxon test. (B) Heat map shows hierarchical clustering of *ID1* and *RUNX1* genes in *BMPR1B*<sup>+</sup> cells (*n* = 8) from group-A *BCR-ABL*<sup>+</sup> SCs (left) or group-B *BCR-ABL*<sup>+</sup> SCs (right). (C) Heat map shows hierarchical clustering of *IL2\_Stat5* signaling pathway genes in *BMPR1B*<sup>+</sup> cells (*n* = 8) from group-A *BCR-ABL*<sup>+</sup> SCs (left) or group-B *BCR-ABL*<sup>+</sup> SCs (right).

Supplemental Figure 2. (A) *CD34*, *CD38*, *CD123*, *TPOR*, *BMPR1B*, *NANOG*, *c-Myc*, *FOXO1*, *FOXO3a*, *HIF2A*, *ALOX5*, *TWIST1*, *BCL2* and *BCL-XL* mRNA levels from TF1-BAP cells. TF1-BA cells were used as comparators for each sample; *N* = 4. T-test significant *P*-values are indicated by red asterisks in the figure. (B) Dot plot showing BMP4 secretion, analyzed by ELISA, from TF1-BA and TF1-BAP supernatants.

Supplemental Figure 3. (A) Representative pictures of myeloid-derived (top), Erythroid-derived (middle) or mixed (bottom) CFC colonies from primary Normal Bone Marrow (NBM) CD34<sup>+</sup>, TF1 WT, TF1 BA or TF1-BAP cells. (B) Representative pictures derived LTC-IC colonies from TF1 BA or TF1-BAP cells.

Supplemental Figure 4. (A) Western blots showing *BCR-ABL*, *CRKL* and *SMAD1/5/8* phosphorylation levels in TF1-BA and TF1-BAP cells following 2 h of TKI treatment; Scatter plot showing P-*BCR-ABL*/*BCR-ABL* ratio and P-*CRKL* (*GAPDH* used as internal control), *n* = 5-6. (B) Western blots showing *Stat3* phosphorylation (Tyr705) levels (relative to *Stat3*) in TF1-BA and

TF1-BAP cells; Scatter plot showing P-Stat3/Stat3 ratio (GAPDH used as internal control) n = 3.

Supplemental Figure 5. (A) TF1-BAP cells treated with AG490 (25  $\mu$ M) for 24 h and analyzed for their content of P-Smad1/5/8 (left) or P-Stat3 (right). (B-C) TF1-BAP cells treated with Imatinib (IM) (2  $\mu$ M) or AG490 (25  $\mu$ M) or E6201 (100 nM) for 24 h and analyzed for their P-CRKL (B), P-ERK (B) or cleaved caspase3 (C) contents. (D) TF1-BAP cells treated with AG490 (25  $\mu$ M) + E6201 (100 nM) for 24 h and analyzed for their P-Smad1/5/8 (left) or P-Stat3 (right) contents.

Supplemental Figure 6. (A-B) ELISA quantification of BMP2 (A) and BMP4 (B) in BM plasma from healthy donors, CML patients at diagnosis and CCyR patients (at remission). Results from individual samples are expressed in picograms per milliliter, and horizontal lines represent mean values  $\pm$  SEM of the indicated number of analyzed samples. (C) Mesenchymal stem cells from normal bone marrow donors were treated with Imatinib, AG490 or E6201 for 3 days. Comparative transcriptional expression of BMP4 gene, results from 2 individual samples analyzed are expressed in arbitrary units, and the horizontal line represents mean values  $\pm$  SEM, determined compared to untreated controls. Unpaired t-test significant *P*-values are indicated by asterisks in the figures. (D) TF1-BA and TF1-BAP cells treated or not with BMP4 (20 ng/ml for 24 h) were analyzed for their content in P-Stat3.

Supplemental Figure 7. (A) ELISA quantification of BMP4 in supernatants from HS5 and HS27A MSC cells. (B) TF1-BAP cells were seeded on top of a HS5 layer and then treated for 3 days with Imatinib (IM) (2  $\mu$ M), with or without AG490 (25  $\mu$ M) + E6201 (100 nM). Then TF1-BAP (GFP tagged) cells adherent fraction was harvested and analyzed for their content of Ki67-PE. Unpaired t-test significant *P*-values are indicated in the figure, *P*<0.05, \**P*<0.01, \*\*

Supplemental Table1. Results from BMP signaling pathway GSEA between group-A BCR-ABL+ SCs from patients at remission and group-B BCR-ABL+ SCs from patients at remission.

Supplemental Table 2. Chemical structure of E6201 (Top) and IC50 on top target genes with 100nM E6201 (Bottom).

# Supp Figure 1

**A**

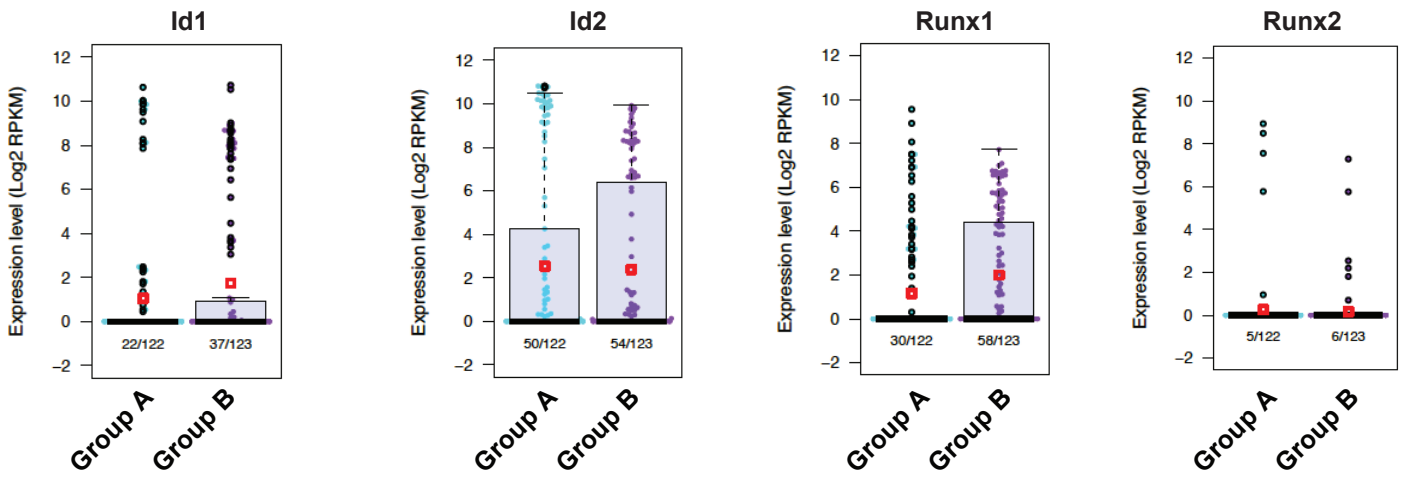

**B**

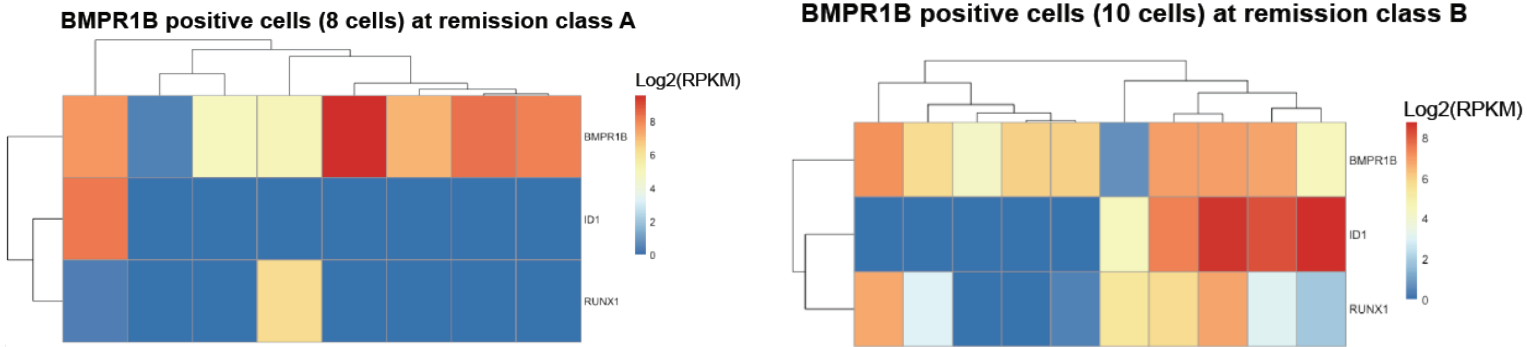

**C**

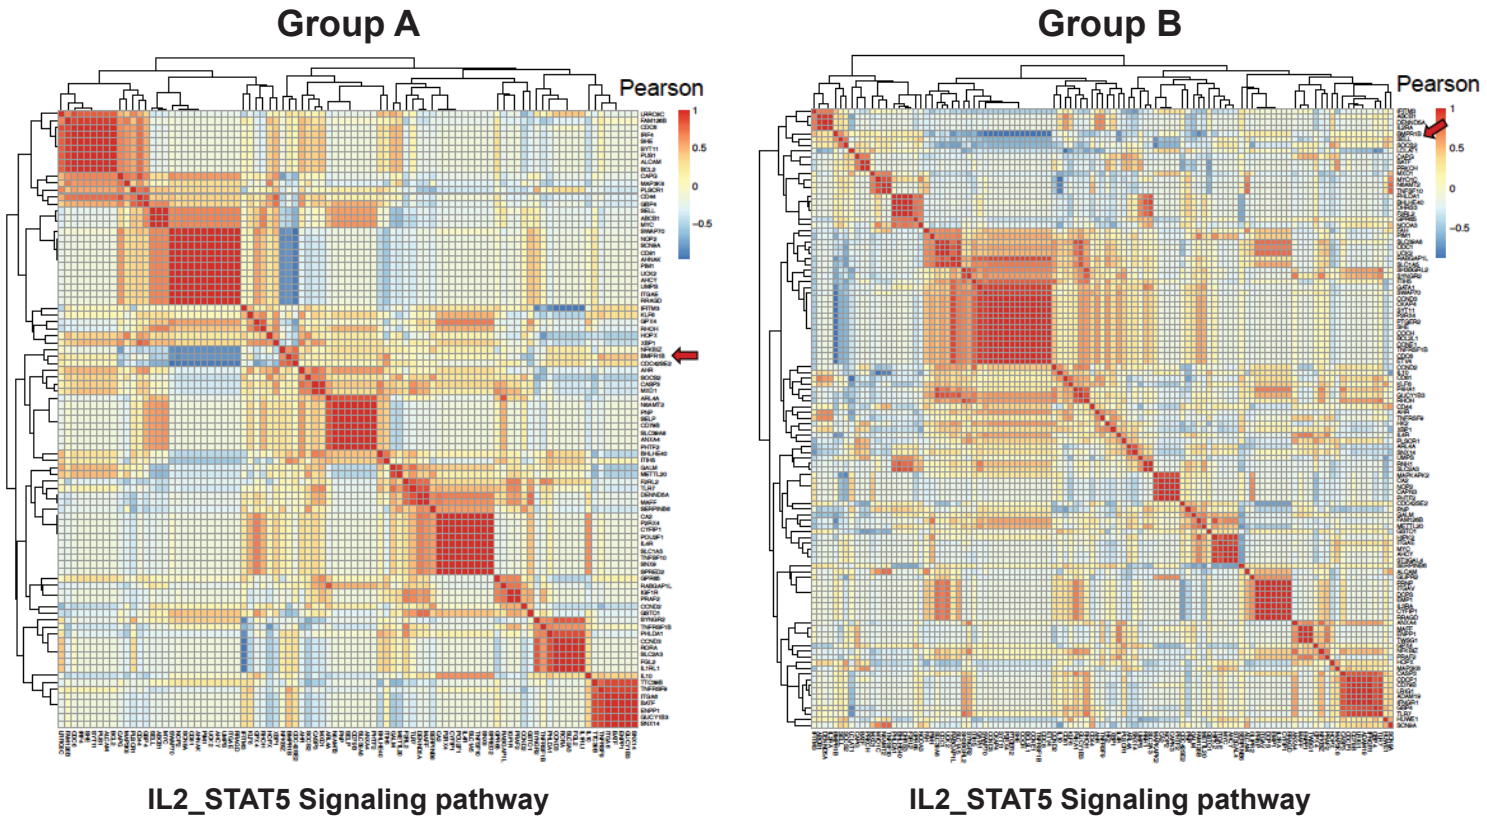

# Supp Figure 2

**A**

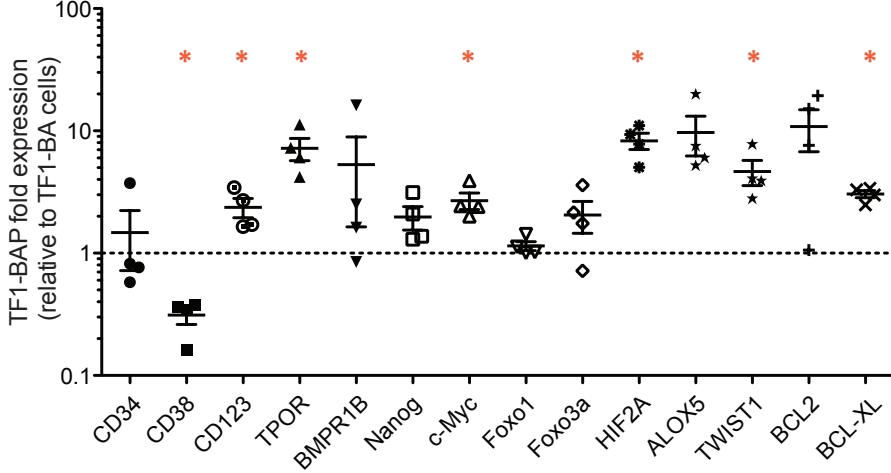

**B**

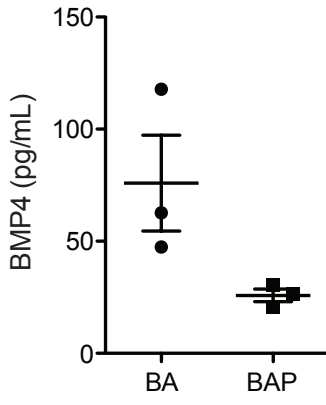

# Supp Figure 3

**A**

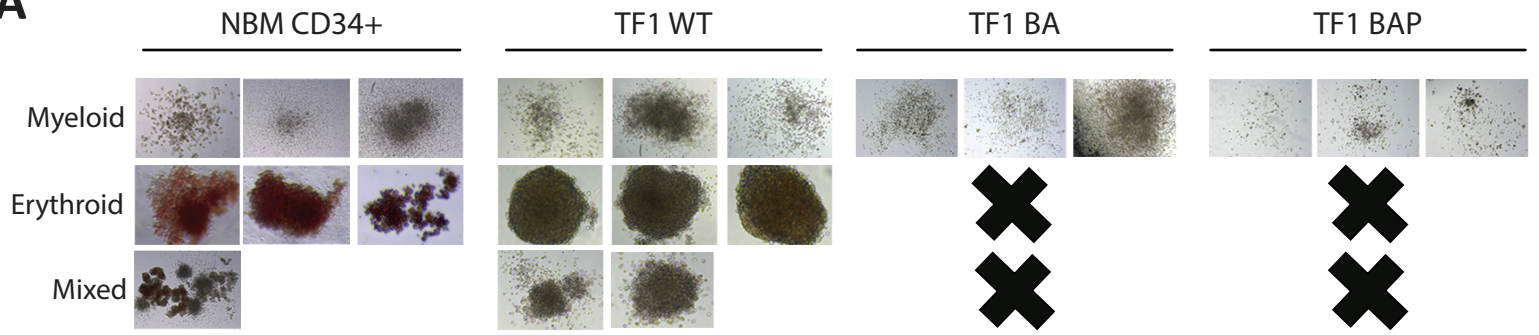

**B**

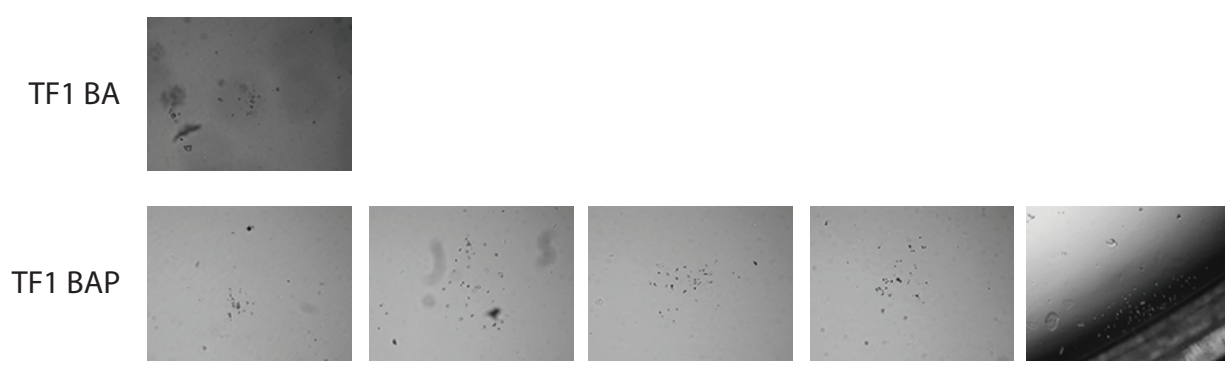



# Supp Figure 4

**A**

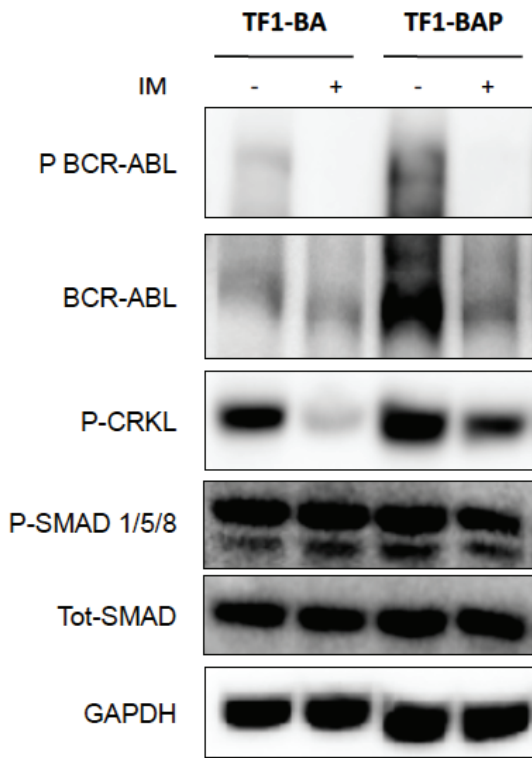

P-BCR-ABL / BCR-ABL / GAPDH

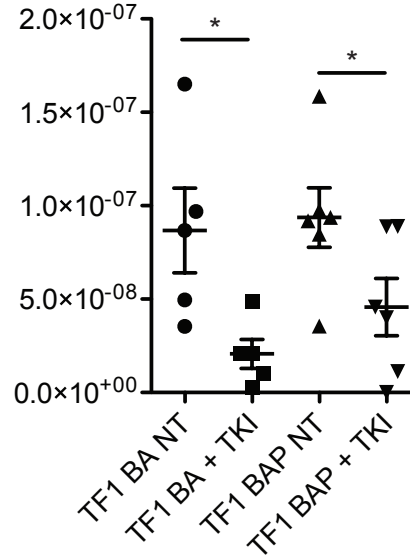

P-CRKL / GAPDH

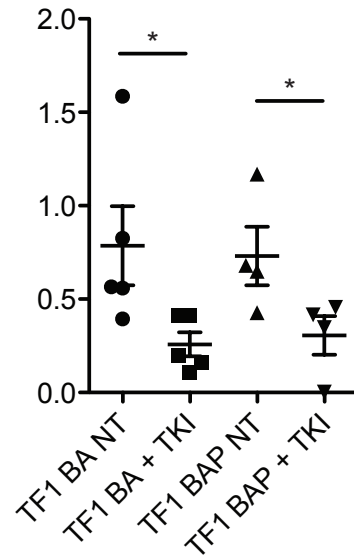

**B**

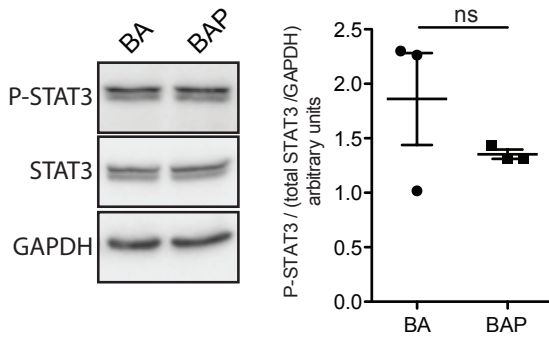

# Supp Figure 5

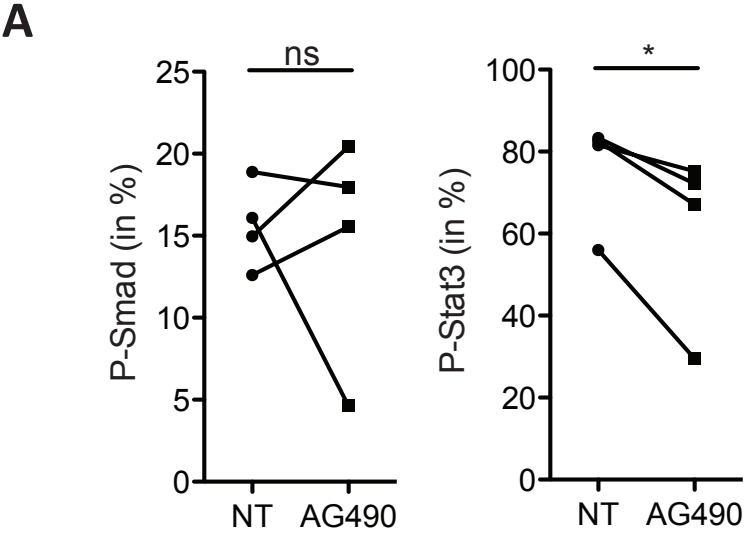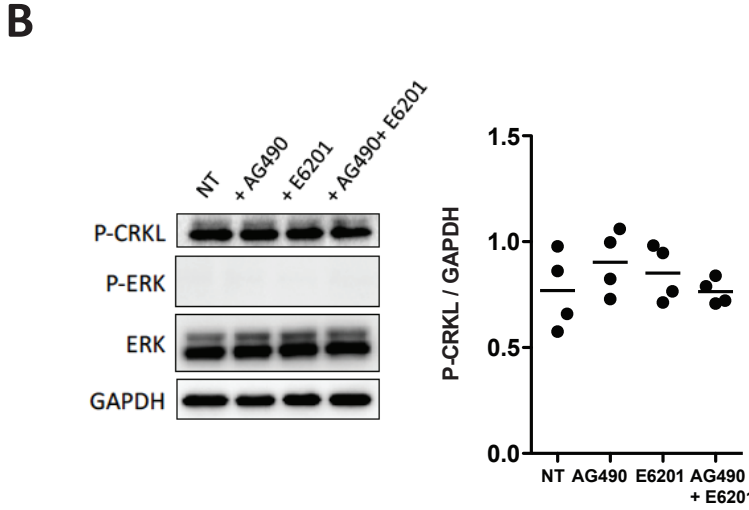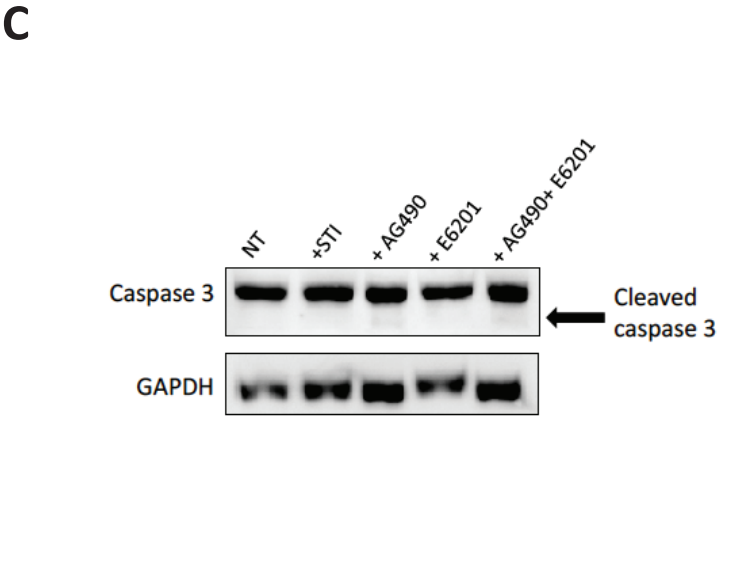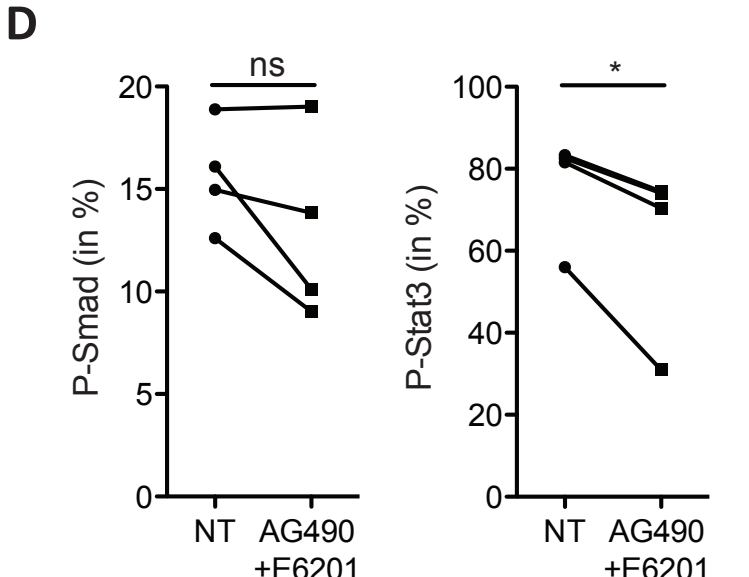

# Supp Figure 6

**A**

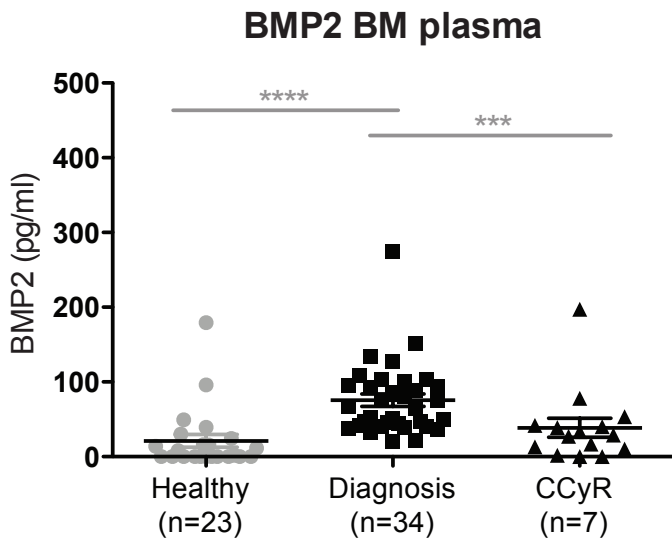

**B**

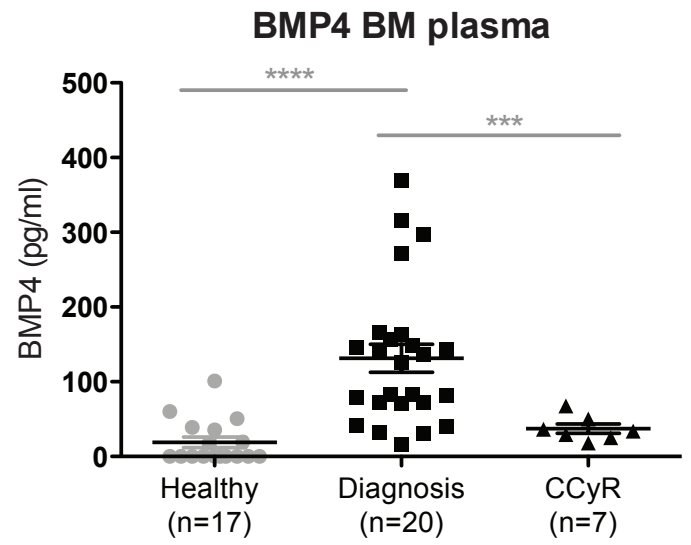

**C**

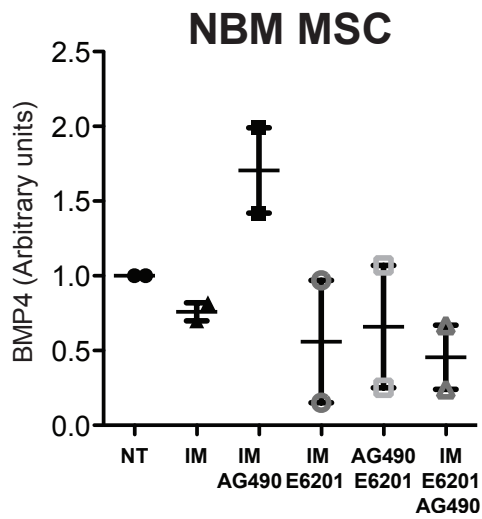

**D**

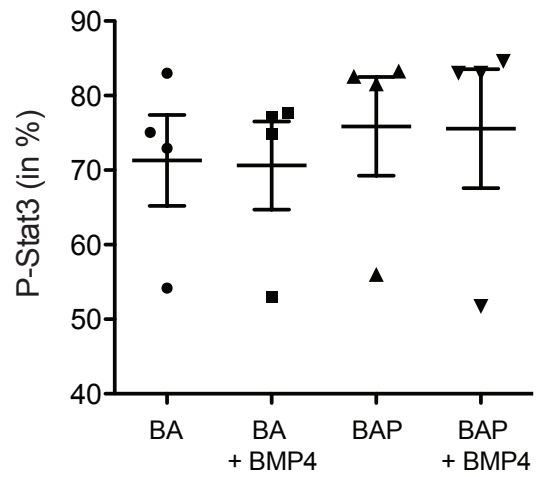

# Supp Figure 7

A

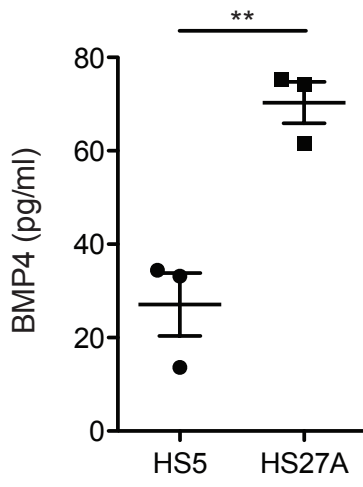

B

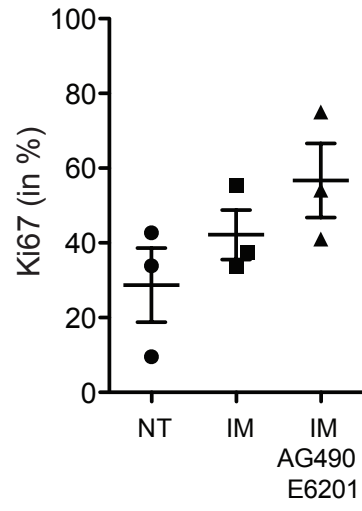

## Supp Table S1. BMP Signaling pathway GSEA

| PROBE     | RANK IN GENE LIST | RANK METRIC SCORE | RUNNING ES | CORE ENRICHMENT |
|-----------|-------------------|-------------------|------------|-----------------|
| NOG       | 226               | 0,1885            | 0,0596     | Yes             |
| ID2       | 246               | 0,1850            | 0,1269     | Yes             |
| SMAD2     | 505               | 0,1511            | 0,1714     | Yes             |
| ACVR2B    | 618               | 0,1425            | 0,2190     | Yes             |
| BMP7      | 813               | 0,1303            | 0,2586     | Yes             |
| SMAD5     | 904               | 0,1269            | 0,3014     | Yes             |
| BMP8A     | 1382              | 0,1102            | 0,3215     | Yes             |
| ACVR2A    | 1395              | 0,1099            | 0,3614     | Yes             |
| RUNX3     | 1783              | 0,0991            | 0,3812     | Yes             |
| RUNX2     | 1789              | 0,0990            | 0,4174     | Yes             |
| ID3       | 1879              | 0,0962            | 0,4490     | Yes             |
| SMURF1    | 2069              | 0,0920            | 0,4747     | Yes             |
| ACVRL1    | 2663              | 0,0864            | 0,4811     | Yes             |
| BMPR1B    | 2892              | 0,0828            | 0,5017     | Yes             |
| SMAD7     | 3279              | 0,0756            | 0,5130     | Yes             |
| BMP2K     | 4437              | 0,0559            | 0,4839     | No              |
| TWSG1     | 5742              | 0,0344            | 0,4407     | No              |
| SMAD3     | 6223              | 0,0271            | 0,4301     | No              |
| RUNX1     | 6764              | 0,0195            | 0,4142     | No              |
| ACVR1B    | 7284              | 0,0132            | 0,3968     | No              |
| DAND5     | 7559              | 0,0102            | 0,3888     | No              |
| CHRD1     | 7964              | 0,0065            | 0,3739     | No              |
| BMPR2     | 8283              | 0,0042            | 0,3618     | No              |
| BAMBI     | 8780              | 0,0000            | 0,3405     | No              |
| BMP15     | 8805              | 0,0000            | 0,3395     | No              |
| BMP2      | 8806              | 0,0000            | 0,3395     | No              |
| BMP5      | 8807              | 0,0000            | 0,3395     | No              |
| BMP6      | 8808              | 0,0000            | 0,3395     | No              |
| BMPER     | 8810              | 0,0000            | 0,3394     | No              |
| BMPR1A    | 8811              | 0,0000            | 0,3394     | No              |
| CER1      | 9171              | 0,0000            | 0,3241     | No              |
| CHRD2     | 9198              | 0,0000            | 0,3230     | No              |
| GREM1     | 10032             | 0,0000            | 0,2873     | No              |
| SMAD6     | 13175             | 0,0000            | 0,1526     | No              |
| TNFRSF11B | 13609             | 0,0000            | 0,1341     | No              |
| TNFSF11   | 13611             | 0,0000            | 0,1340     | No              |
| TWIST1    | 13699             | 0,0000            | 0,1303     | No              |
| ID1       | 14417             | -0,0062           | 0,1018     | No              |
| SMAD9     | 16035             | -0,0280           | 0,0429     | No              |
| SMAD1     | 16926             | -0,0428           | 0,0204     | No              |
| SMURF2    | 17163             | -0,0471           | 0,0277     | No              |
| BMP4      | 19096             | -0,0836           | -0,0244    | No              |
| FST       | 20088             | -0,0944           | -0,0321    | No              |
| SMAD4     | 20464             | -0,1029           | -0,0103    | No              |
| BMP1      | 22496             | -0,1694           | -0,0351    | No              |
| ENG       | 22856             | -0,1986           | 0,0226     | No              |

## Supp Table S2

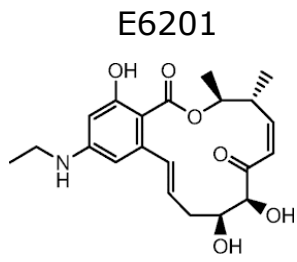

| Gene   | IC50@100nM |
|--------|------------|
| MEK1   | 0,1        |
| MEK2   | 0,1        |
| BMPR1B | 0,45       |
| BMPR1A | 36         |
| BMPR2  | 77         |
| JAK1   | 89         |
| JAK2   | 100        |
